# Supplementary material for: Social and environmental analysis of food waste abatement via the peer-to-peer sharing economy
Source: PubMed Central journal article supplement (PMC7064594; doi:10.1038/s41467-020-14899-5), 2020-03-10
Supplement: 41467_2020_14899_MOESM1_ESM.pdf [file 41467_2020_14899_MOESM1_ESM.pdf]

## Supplementary Information

### **Social and environmental analysis of food waste abatement via the Peer-to-Peer Sharing Economy**

Makov et al.

[makovt@bgu.ac.il](mailto:makovt@bgu.ac.il)

## Supplementary figures

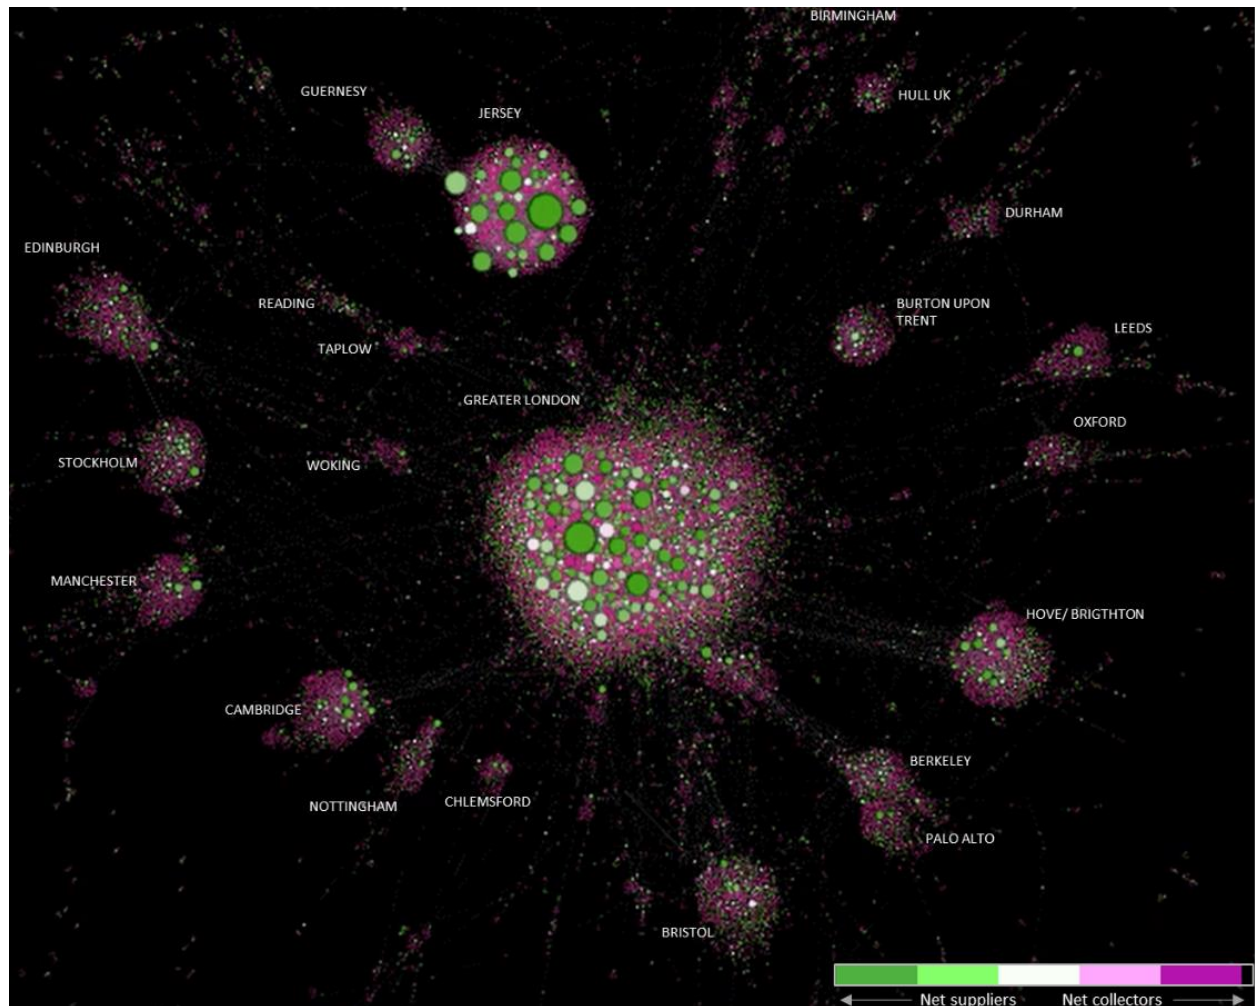

**Supplementary Figure 1:** Social network of food exchanges. Interconnected social network representing food exchanges via OLIO. Nodes (dots) represent users and lines represent exchanges. Node size is proportional to the number of overall exchanges users engaged. Node color represents the share of items supplied out of overall exchanges from green (net supplier) to purple (net collector).

## Supplementary Tables

*Makov et al. 2020, Social and environmental analysis of food waste abatement via the Peer-to- Peer Sharing Economy*

### Table of contents

|           |                                                                                      |
|-----------|--------------------------------------------------------------------------------------|
| Table S1a | Avoided food waste and associated GHG emissions, Full OLIO network                   |
| Table S1b | Estimated retail value of all foods exchanged, Full OLIO network                     |
| Table S2a | Collection rates by category and supplier's Food Waste Hero status (# of listings)   |
| Table S2b | Collection rates by category and supplier's Food Waste Hero status (percent)         |
| Table S3a | Avoided food waste, Greater London area                                              |
| Table S3b | Added GHG emissions from road travel (tons CO <sub>2</sub> eq), Greater London       |
| Table S3c | Avoided vs. added emissions (Greater London)                                         |
| Table S3d | Number of exchanges (edges) by user group and food category, Greater London area     |
| Table S4a | Sensitivity analysis, Cost benefit (tons of CO <sub>2</sub> eq reduced)              |
| Table S4b | Sensitivity analysis, Added GHG emissions from road travel (tons CO <sub>2</sub> eq) |
| Table S4c | Sensitivity analysis, Added GHG emissions from road travel (tons CO <sub>2</sub> eq) |
| Table S5  | Carbon Opportunity Cost (COC)                                                        |
| Table S6  | Food category definitions and weights based on empirical sample                      |
| Table S7a | Monte Carlo results by user type and food category, weights and GHG emissions        |
| Table S7b | Monte Carlo results by user type and food category, economic value                   |
| Table S8a | Number of exchanges by UK Income Deciles                                             |
| Table S8b | Number of exchanges by UK Education Deciles                                          |

**Table S1a. Avoided food waste and associated GHG emissions, Full OLIO network**

|                                   | <b>Total mass<br/>(tons)</b> | <b>Total GHG associated with<br/>avoided food waste<br/>(tons CO<sub>2</sub>eq)</b> |
|-----------------------------------|------------------------------|-------------------------------------------------------------------------------------|
| <b>5<sup>th</sup> percentile</b>  | 90                           | 386                                                                                 |
| <b>Mean</b>                       | 91                           | 391                                                                                 |
| <b>Median</b>                     | 91                           | 391                                                                                 |
| <b>95<sup>th</sup> percentile</b> | 92                           | 397                                                                                 |

**Table S1b. Estimated retail value of all foods exchanged, Full OLIO network**

|                                   | <b>Total retail value<br/>(£ 10<sup>6</sup>)</b> |
|-----------------------------------|--------------------------------------------------|
| <b>5<sup>th</sup> percentile</b>  | 0.721                                            |
| <b>Mean</b>                       | 0.734                                            |
| <b>Median</b>                     | 0.7                                              |
| <b>95<sup>th</sup> percentile</b> | 0.747                                            |

Table S2a. Collection rates by category and supplier's Food Waste Hero status (# of listings)

|                          | Regular users |               |               | Food Waste Heroes |               |                | Total         |                |                |
|--------------------------|---------------|---------------|---------------|-------------------|---------------|----------------|---------------|----------------|----------------|
|                          | Not collected | Collected     | Total         | Not collected     | Collected     | Total          | Not collected | Collected      | Total          |
| Baby food                | 413           | 149           | 562           | 46                | 35            | 81             | 459           | 184            | 643            |
| Baked goods              | 3,463         | 3,208         | 6,671         | 17,781            | 25,149        | 42,930         | 21,244        | 28,357         | 49,601         |
| Beverages                | 1,409         | 1,439         | 2,848         | 637               | 1,097         | 1,734          | 2,046         | 2,536          | 4,582          |
| Dairy                    | 591           | 494           | 1,085         | 627               | 1,004         | 1,631          | 1,218         | 1,498          | 2,716          |
| Frozen food              | 260           | 249           | 509           | 69                | 122           | 191            | 329           | 371            | 700            |
| Snack & packaged food    | 1,699         | 1,634         | 3,333         | 965               | 2,346         | 3,311          | 2,664         | 3,980          | 6,644          |
| Kitchen & pantry staples | 9,290         | 7,481         | 16,771        | 4,169             | 7,753         | 11,922         | 13,459        | 15,234         | 28,693         |
| Mixed                    | 273           | 323           | 596           | 559               | 1,706         | 2,265          | 832           | 2,029          | 2,861          |
| Prepared food            | 2,169         | 1,768         | 3,937         | 5,439             | 12,976        | 18,415         | 7,608         | 14,744         | 22,352         |
| Produce                  | 3,577         | 3,350         | 6,927         | 5,648             | 14,030        | 19,678         | 9,225         | 17,380         | 26,605         |
| Protein                  | 557           | 543           | 1,100         | 465               | 1,038         | 1,503          | 1,022         | 1,581          | 2,603          |
| Sandwiches               | 453           | 874           | 1,327         | 4,565             | 11,056        | 15,621         | 5,018         | 11,930         | 16,948         |
| Tea & coffee             | 1,290         | 1,235         | 2,525         | 389               | 682           | 1,071          | 1,679         | 1,917          | 3,596          |
| <b>Total</b>             | <b>25,444</b> | <b>22,747</b> | <b>48,191</b> | <b>41,359</b>     | <b>78,994</b> | <b>120,353</b> | <b>66,803</b> | <b>101,741</b> | <b>168,544</b> |
| % of total               | 53%           | 47%           |               | 34%               | 66%           | 71%            | 40%           | 60%            |                |

Table S2b. Collection rates by category and supplier's Food Waste Hero status (percent)

| CATEGORY                 | Regular Users |            |                     | Food Waste Heroes |            |                     | Total         |            |       |
|--------------------------|---------------|------------|---------------------|-------------------|------------|---------------------|---------------|------------|-------|
|                          | Not collected | Collected  | % of category total | Not collected     | Collected  | % of category total | Not collected | Collected  | Total |
| Baby food                | 73%           | 27%        | 87%                 | 57%               | 43%        | 13%                 | 71%           | 29%        | 0%    |
| Baked goods              | 52%           | 48%        | 13%                 | 41%               | 59%        | 87%                 | 43%           | 57%        | 29%   |
| Beverages                | 49%           | 51%        | 62%                 | 37%               | 63%        | 38%                 | 45%           | 55%        | 3%    |
| Dairy                    | 54%           | 46%        | 40%                 | 38%               | 62%        | 60%                 | 45%           | 55%        | 2%    |
| Frozen food              | 51%           | 49%        | 73%                 | 36%               | 64%        | 27%                 | 47%           | 53%        | 0%    |
| Snack & packaged food    | 51%           | 49%        | 50%                 | 29%               | 71%        | 50%                 | 40%           | 60%        | 4%    |
| Kitchen & pantry staples | 55%           | 45%        | 58%                 | 35%               | 65%        | 42%                 | 47%           | 53%        | 17%   |
| Mixed                    | 46%           | 54%        | 21%                 | 25%               | 75%        | 79%                 | 29%           | 71%        | 2%    |
| Prepared food            | 55%           | 45%        | 18%                 | 30%               | 70%        | 82%                 | 34%           | 66%        | 13%   |
| Produce                  | 52%           | 48%        | 26%                 | 29%               | 71%        | 74%                 | 35%           | 65%        | 16%   |
| Protein                  | 51%           | 49%        | 42%                 | 31%               | 69%        | 58%                 | 39%           | 61%        | 2%    |
| Sandwiches               | 34%           | 66%        | 8%                  | 29%               | 71%        | 92%                 | 30%           | 70%        | 10%   |
| Tea & coffee             | 51%           | 49%        | 70%                 | 36%               | 64%        | 30%                 | 47%           | 53%        | 2%    |
| <b>Total</b>             | <b>53%</b>    | <b>47%</b> | <b>29%</b>          | <b>34%</b>        | <b>66%</b> | <b>71%</b>          | <b>40%</b>    | <b>60%</b> |       |

Notice that since listings often contain more than one food item, the number of exchanges (i.e. network edges) can be larger than the number of listing collected. The cost benefit analysis is calculated according to the number of exchanges. in the greater London area.

**Table S3a. Avoided food waste, Greater London area**

|                                                      | Mean | Median | 5 <sup>th</sup> percentile | 95 <sup>th</sup> percentile |
|------------------------------------------------------|------|--------|----------------------------|-----------------------------|
| Total mass (metric tons)                             | 41   | 41     | 40                         | 42                          |
| Total GHG reduction (metric tons CO <sub>2</sub> eq) | 176  | 176    | 171                        | 181                         |

**Table 3b. Added GHG emissions from road travel (tons CO<sub>2</sub>eq), Greater London**

| Travel scenario | Mean | Median | 5 <sup>th</sup> percentile | 95 <sup>th</sup> percentile | Minimal displacement (mean) |
|-----------------|------|--------|----------------------------|-----------------------------|-----------------------------|
| 1               | 89   | 89     | 74                         | 103                         | 50%                         |
| 2               | 44   | 44     | 37                         | 52                          | 25%                         |
| 3               | 42   | 42     | 35                         | 48                          | 24%                         |
| 4               | 43   | 43     | 36                         | 51                          | 25%                         |
| 5               | 22   | 22     | 18                         | 25                          | 12%                         |
| 6               | 20   | 20     | 17                         | 24                          | 12%                         |

**Table S3c. Avoided vs. added emissions Greater London (tons of CO<sub>2</sub>eq avoided)**

| Travel scenario | Mean | Median | 5 <sup>th</sup> percentile | 95 <sup>th</sup> percentile |
|-----------------|------|--------|----------------------------|-----------------------------|
| 1               | 87   | 87     | 72                         | 103                         |
| 2               | 132  | 132    | 123                        | 140                         |
| 3               | 135  | 134    | 126                        | 143                         |
| 4               | 133  | 133    | 124                        | 141                         |
| 5               | 154  | 154    | 148                        | 160                         |
| 6               | 156  | 156    | 150                        | 162                         |

**Table S3d. Number of exchanges (i.e. edges) by supplier user group and food category, Greater London area**

|                       | Regular-user  | Food waste hero | Total         |
|-----------------------|---------------|-----------------|---------------|
| baby food             | 125           | 22              | 134           |
| baked goods           | 1,771         | 15,127          | 17,376        |
| beverages             | 826           | 924             | 1,886         |
| dairy                 | 320           | 773             | 1,144         |
| frozen food           | 116           | 62              | 193           |
| kitchen store - snack | 894           | 2,136           | 3,178         |
| kitchen store - store | 4,309         | 5,143           | 9,804         |
| mixed                 | 193           | 3,029           | 3,282         |
| prepared food         | 1,177         | 12,694          | 14,081        |
| produce               | 1,378         | 3,072           | 4,811         |
| protein               | 741           | 587             | 922           |
| sandwiches            | 1,032         | 10,995          | 12,044        |
| tea & coffee          | 302           | 517             | 1,282         |
| <b>Total</b>          | <b>13,184</b> | <b>55,081</b>   | <b>70,137</b> |
| <i>% of total</i>     | <i>19%</i>    | <i>79%</i>      |               |

The sensitivity analysis followed the same steps as the main analysis using different GHG emissions coefficients. For environmental benefits resulting from avoided food waste, we chose a lower value for GHG reductions  $e_{\text{waste}} = 2.1\text{tCO}_2\text{eq/ton food waste}$ , as reported by the European Commission (2011) for the whole EU. For environmental costs associated with added road travel, we chose higher emissions factors -  $e_{\text{car}} = 240\text{gCO}_2\text{eq/passenger-km}$ , as reported by European Environment Agency (2018) for the average passenger vehicle in the EU, and  $e_{\text{bus}} = 120\text{gCO}_2\text{eq/passenger-km}$ , as reported for a regular bus outside of London by Hill et al. (2018). Since no uncertainty was reported for these coefficients, we used Monte Carlo analysis ( $10^4$ ) to estimate them (assuming a normal distribution with a coefficient of variation of 10%).

**Table 4a. Sensitivity analysis, Cost benefit (tons of CO<sub>2</sub>eq reduced)**

| Travel scenario | Mean | Median | 5th percentile | 95th percentile |
|-----------------|------|--------|----------------|-----------------|
| 1               | -31  | -31    | -50            | -12             |
| 2               | 27   | 27     | 17             | 36              |
| 3               | 30   | 30     | 21             | 40              |
| 4               | 27   | 27     | 17             | 36              |
| 5               | 56   | 56     | 51             | 61              |
| 6               | 57   | 58     | 53             | 63              |

**Table 4b. Sensitivity analysis, Added GHG emissions from road travel (tons CO<sub>2</sub>eq)**

|                                             | Mean | Median | 5th percentile | 95th percentile |
|---------------------------------------------|------|--------|----------------|-----------------|
| Total mass (tons)                           | 41   | 41     | 40             | 42              |
| Total GHG avoided (tons CO <sub>2</sub> eq) | 85   | 85     | 83             | 87              |

**Table S4c. Sensitivity analysis, Added GHG emissions from road travel (tons CO<sub>2</sub>eq)**

| Travel scenario | Mean | Median | 5th percentile | 95th percentile |
|-----------------|------|--------|----------------|-----------------|
| 1               | 116  | 116    | 97             | 135             |
| 2               | 58   | 58     | 48             | 67              |
| 3               | 54   | 54     | 45             | 63              |
| 4               | 58   | 58     | 49             | 67              |
| 5               | 29   | 29     | 24             | 34              |
| 6               | 27   | 27     | 23             | 31              |

The calculation of the carbon opportunity cost was preformed by assigning values for COC from Searchinger et al, 2018 to each food group and calculating a weighted average for COC/kg of food waste based on the relative share of each food group in the overall composition of UK food waste (as detailed by WRAP, 2012).

**Table 5. Carbon Opportunity Cost**

| Food type                                 | Mass of edible portion (tonnes/yr) | Mass of inedible portion (tonnes/yr) | Total (tonnes/yr) | Relative share of item out of total food waste mass | Carbon opportunity cost (avg gain and loss) kgCO <sub>2</sub> /kg waste weight | Notes on COC                                                         | COC per item (kgCO <sub>2</sub> /kg waste) |
|-------------------------------------------|------------------------------------|--------------------------------------|-------------------|-----------------------------------------------------|--------------------------------------------------------------------------------|----------------------------------------------------------------------|--------------------------------------------|
| <b>Fresh vegetable and salads</b>         | <b>1300000</b>                     | <b>230000</b>                        | <b>1530000</b>    | <b>0.258</b>                                        |                                                                                |                                                                      | <b>0.221</b>                               |
| Potato                                    | 710000                             | 0                                    | 710000            | 0.106                                               | 1.07                                                                           | sweet potato tuber                                                   | 0.113                                      |
| onion                                     | 47000                              | 68000                                | 115000            | 0.017                                               | 0.67                                                                           | vegetables (all)                                                     | 0.012                                      |
| carrot                                    | 96000                              | 17000                                | 113000            | 0.017                                               | 0.67                                                                           | vegetables (all)                                                     | 0.011                                      |
| lettuce                                   | 57000                              | 11000                                | 68000             | 0.010                                               | 0.67                                                                           | vegetables (all)                                                     | 0.007                                      |
| Other root vegetables                     | 29000                              | 30000                                | 59000             | 0.009                                               | 0.67                                                                           | vegetables (all)                                                     | 0.006                                      |
| cabbage                                   | 43000                              | 15000                                | 58000             | 0.009                                               | 0.67                                                                           | vegetables (all)                                                     | 0.006                                      |
| cucumber                                  | 43000                              | 7000                                 | 50000             | 0.007                                               | 0.67                                                                           | vegetables (all)                                                     | 0.005                                      |
| tomato                                    | 46000                              | 3000                                 | 49000             | 0.007                                               | 0.67                                                                           | vegetables (all)                                                     | 0.005                                      |
| cauliflower                               | 46000                              | 0                                    | 46000             | 0.007                                               | 0.67                                                                           | vegetables (all)                                                     | 0.005                                      |
| broccoli                                  | 41000                              | 0                                    | 41000             | 0.006                                               | 0.67                                                                           | vegetables (all)                                                     | 0.004                                      |
| pepper                                    | 16000                              | 19000                                | 35000             | 0.005                                               | 0.67                                                                           | vegetables (all)                                                     | 0.004                                      |
| mixed vegetables                          | 28000                              | 3000                                 | 31000             | 0.005                                               | 0.67                                                                           | vegetables (all)                                                     | 0.003                                      |
| leafy salad                               | 22000                              | 3000                                 | 25000             | 0.004                                               | 0.67                                                                           | vegetables (all)                                                     | 0.003                                      |
| mushroom                                  | 22000                              | 0                                    | 22000             | 0.003                                               | 0.67                                                                           | vegetables (all)                                                     | 0.002                                      |
| leek                                      | 10000                              | 11000                                | 21000             | 0.003                                               | 0.67                                                                           | vegetables (all)                                                     | 0.002                                      |
| sweetcorn corn on the cob                 | 7000                               | 9000                                 | 16000             | 0.002                                               | 0.67                                                                           | vegetables (all)                                                     | 0.002                                      |
| bean all varieties                        | 8000                               | 4000                                 | 12000             | 0.002                                               | 3.87                                                                           | average of common beans, chickpeas, cowpeas, pigeon peas and lentils | 0.007                                      |
| spring onion                              | 6000                               | 5000                                 | 11000             | 0.002                                               | 0.67                                                                           | vegetables (all)                                                     | 0.001                                      |
| all other fresh vegetables and salads     | 49000                              | 22000                                | 71000             | 0.011                                               | 0.67                                                                           | vegetables (all)                                                     | 0.007                                      |
| processed potato                          | 1326000                            | 227000                               | 1553000           |                                                     |                                                                                |                                                                      |                                            |
| coleslaw                                  | 77000                              | 1000                                 | 78000             | 0.012                                               | 0.67                                                                           | vegetables (all)                                                     | 0.008                                      |
| all other processed vegetables and salads | 20000                              | 1000                                 | 21000             | 0.003                                               | 0.67                                                                           | vegetables (all)                                                     | 0.002                                      |
| Drink                                     | 700000                             | 540000                               | 1240000           | 0.182                                               |                                                                                |                                                                      | 1.127                                      |
| tea waste                                 | 56000                              | 480000                               | 525000            | 0.078                                               | 12.96                                                                          | tea leaves (dried)                                                   | 1.016                                      |
| carbonated soft drink                     | 230000                             | 0                                    | 230000            | 0.034                                               | 0.02                                                                           | sugar crops                                                          | 0.001                                      |
| fruit juice and smoothies                 | 120000                             | 0                                    | 120000            | 0.018                                               | 2.77                                                                           | other fruit temperate                                                | 0.050                                      |
| lager, beer and cider                     | 75000                              | 0                                    | 75000             | 0.011                                               | 0.16                                                                           | wheat grains                                                         | 0.002                                      |
| bottled water                             | 54000                              | 0                                    | 54000             | 0.008                                               | 0.00                                                                           |                                                                      | 0.000                                      |
| wine                                      | 42000                              | 0                                    | 42000             | 0.006                                               | 1.58                                                                           | other fruit temperate                                                | 0.010                                      |
| squash                                    | 39000                              | 0                                    | 39000             | 0.006                                               | 0.01                                                                           | sugar crops                                                          | 0.000                                      |
| all other drink                           | 77000                              | 63000                                | 130000            | 0.019                                               | 2.50                                                                           |                                                                      | 0.049                                      |
| Fresh fruit                               | 693000                             | 543000                               | 1215000           |                                                     |                                                                                |                                                                      |                                            |
| banana                                    | 300000                             | 620000                               | 920000            | 0.138                                               |                                                                                |                                                                      | 0.139                                      |
| banana                                    | 47000                              | 270000                               | 317000            | 0.047                                               | 1.02                                                                           | banana                                                               | 0.048                                      |
| melon                                     | 24000                              | 85000                                | 109000            | 0.016                                               | 1.00                                                                           | other fruit temperate                                                | 0.016                                      |
| apple                                     | 63000                              | 38000                                | 101000            | 0.015                                               | 1.00                                                                           | other fruit temperate                                                | 0.015                                      |
| orange                                    | 29000                              | 69000                                | 98000             | 0.015                                               | 1.00                                                                           | other fruit temperate                                                | 0.015                                      |
| stone fruit                               | 37000                              | 33000                                | 70000             | 0.010                                               | 1.00                                                                           | other fruit temperate                                                | 0.010                                      |
| pineapple                                 | 10000                              | 59000                                | 69000             | 0.010                                               | 1.00                                                                           | other fruit temperate                                                | 0.010                                      |
| other citrus                              | 18000                              | 39000                                | 57000             | 0.009                                               | 1.00                                                                           | other fruit temperate                                                | 0.009                                      |
| soft berry fruit                          | 42000                              | 9000                                 | 51000             | 0.008                                               | 1.00                                                                           | other fruit temperate                                                | 0.008                                      |
| pear                                      | 18000                              | 5000                                 | 23000             | 0.003                                               | 1.00                                                                           | other fruit temperate                                                | 0.003                                      |
| all other fresh fruit                     | 13000                              | 13000                                | 26000             | 0.004                                               | 1.00                                                                           | other fruit temperate                                                | 0.004                                      |
| Meat and fish                             | 301000                             | 620000                               | 921000            |                                                     |                                                                                |                                                                      |                                            |
| poultry chicken turkey duck               | 300000                             | 210000                               | 510000            | 0.075                                               |                                                                                |                                                                      | 6.826                                      |
| pork ham bacon                            | 100000                             | 150000                               | 250000            | 0.037                                               | 19.61                                                                          | poultry meat                                                         | 0.732                                      |
| beef                                      | 100000                             | 22000                                | 122000            | 0.018                                               | 25.54                                                                          | pork meat                                                            | 0.465                                      |
| fish and shellfish                        | 47000                              | 4000                                 | 51000             | 0.008                                               | 371.06                                                                         | beef meat                                                            | 2.827                                      |
| fish and shellfish                        | 23000                              | 9000                                 | 32000             | 0.005                                               |                                                                                |                                                                      |                                            |



|                                                 |                |                |                |                                                                           |                                        |                                                                                          |               |
|-------------------------------------------------|----------------|----------------|----------------|---------------------------------------------------------------------------|----------------------------------------|------------------------------------------------------------------------------------------|---------------|
| lamb                                            | 7000           | 7000           | 14000          | 0.002                                                                     | 664.17                                 | sheep/goat meat                                                                          | 1.389         |
| all other meat and fish                         | 23000          | 12000          | 35000          | 0.005                                                                     | 270.09                                 | all meat                                                                                 | 1.412         |
|                                                 | 300000         | 204000         | 504000         |                                                                           |                                        |                                                                                          |               |
| <b>Bakery</b>                                   | <b>500000</b>  | <b>1000</b>    | <b>501000</b>  | <b>0.075</b>                                                              |                                        |                                                                                          | <b>0.104</b>  |
| standard bread                                  | 410000         | 0              | 410000         | 0.061                                                                     | 1.33                                   | wheat grain<br>average of wheat, barely, and<br>sorghum grains                           | 0.082         |
| specialty bread                                 | 43000          | 0              | 43000          | 0.006                                                                     | 2.15                                   |                                                                                          | 0.014         |
| morning goods                                   | 18000          | 0              | 18000          | 0.003                                                                     | 0.80                                   | wheat grain                                                                              | 0.002         |
| all other bakery                                | 29000          | 0              | 29000          | 0.004                                                                     | 1.43                                   |                                                                                          | 0.006         |
|                                                 | 500000         | 0              | 500000         |                                                                           |                                        |                                                                                          |               |
| <b>Dairy and eggs</b>                           | <b>410000</b>  | <b>59000</b>   | <b>469000</b>  | <b>0.070</b>                                                              |                                        |                                                                                          | <b>0.809</b>  |
| milk                                            | 290000         | 0              | 290000         | 0.043                                                                     | 6.64                                   | cow milk                                                                                 | 0.288         |
| eggs                                            | 21000          | 59000          | 80000          | 0.012                                                                     | 11.05                                  | eggs                                                                                     | 0.132         |
| yoghurt                                         | 51000          | 0              | 51000          | 0.008                                                                     | 6.64                                   |                                                                                          | 0.051         |
| cheese                                          | 32000          | 0              | 32000          | 0.005                                                                     | 66.40                                  |                                                                                          | 0.317         |
| cream and crème fraiche                         | 16000          | 0              | 16000          | 0.002                                                                     | 6.64                                   | as yoghurt                                                                               | 0.016         |
| all other dairy and eggs                        | 2000           | 0              | 2000           | 0.000                                                                     | 19.47                                  |                                                                                          | 0.006         |
|                                                 | 412000         | 59000          | 471000         |                                                                           |                                        |                                                                                          |               |
| <b>meals (home made and pre-prepared)</b>       | <b>420000</b>  | <b>1000</b>    | <b>421000</b>  | <b>0.062</b>                                                              |                                        |                                                                                          | <b>5.135</b>  |
| composite meal                                  | 260000         | 0              | 260000         | 0.039                                                                     | 107.46                                 | mixed ingredients                                                                        | 4.174         |
| soup                                            | 70000          | 0              | 70000          | 0.010                                                                     | 0.34                                   |                                                                                          | 0.004         |
| sandwich                                        | 51000          | 0              | 51000          | 0.008                                                                     | 51.95                                  |                                                                                          | 0.396         |
|                                                 |                |                |                |                                                                           |                                        | assuming a mixed composition of<br>grains and dairy and meat                             |               |
| savoury products                                | 35000          | 0              | 35000          | 0.005                                                                     | 107.46                                 |                                                                                          | 0.562         |
|                                                 | 416000         | 0              | 416000         |                                                                           |                                        |                                                                                          |               |
| <b>All other food and drink</b>                 | <b>780000</b>  | <b>360000</b>  | <b>1140000</b> | <b>0.141</b>                                                              |                                        |                                                                                          | <b>4.947</b>  |
| cakes gateau doughnuts<br>pastries              | 75000          | 0              | 75000          | 0.011                                                                     | 4.48                                   | mixed ingredients of sugar, wheat<br>and eggs                                            | 0.050         |
|                                                 |                |                |                |                                                                           |                                        | mixed ingredients of sugar, wheat<br>and eggs                                            |               |
| all other cake and desserts                     | 69000          | 0              | 69000          | 0.010                                                                     | 4.48                                   |                                                                                          | 0.046         |
|                                                 | 144000         | 0              | 144000         |                                                                           |                                        |                                                                                          |               |
| breakfast cereal                                | 60000          | 0              | 60000          | 0.009                                                                     | 1.12                                   | several cereals and sugars                                                               | 0.010         |
| rice                                            | 41000          | 0              | 41000          | 0.006                                                                     | 0.96                                   | rice grains (rough)                                                                      | 0.006         |
| pasta                                           | 31000          | 0              | 31000          | 0.005                                                                     | 2.00                                   | wheat grains                                                                             | 0.009         |
| all other staple foods                          | 10000          | 0              | 10000          | 0.001                                                                     | 1.36                                   |                                                                                          | 0.002         |
|                                                 | 142000         | 0              | 142000         |                                                                           |                                        |                                                                                          |               |
| cook in sauce                                   | 41000          | 0              | 41000          | 0.006                                                                     |                                        |                                                                                          |               |
| gravy                                           | 9000           |                | 9000           | 0.001                                                                     |                                        |                                                                                          |               |
| all other condiments sauces<br>herbs and spices | 83000          | 2000           | 85000          | 0.013                                                                     |                                        |                                                                                          |               |
|                                                 | 133000         | 2000           | 135000         |                                                                           |                                        |                                                                                          |               |
| fat                                             | 11000          | 0              | 11000          | 0.002                                                                     |                                        |                                                                                          |               |
|                                                 |                |                |                |                                                                           |                                        | average of soybean, palm, palm<br>kernel, canola, sunflower, groundnut,<br>and maize oil |               |
| all other oil                                   | 59000          | 3000           | 62000          | 0.009                                                                     | 8.79                                   |                                                                                          | 0.081         |
|                                                 | 70000          | 3000           | 73000          |                                                                           |                                        |                                                                                          |               |
| savoury snacks                                  | 21000          | 1000           | 22000          | 0.003                                                                     | 107.46                                 | mixed ingredients as composite meal                                                      | 0.353         |
|                                                 |                |                |                |                                                                           |                                        | mixed ingredients of flour, sugar and<br>oil                                             |               |
| sweet biscuits                                  | 18000          | 0              | 18000          | 0.003                                                                     | 1.31                                   |                                                                                          | 0.004         |
|                                                 |                |                |                |                                                                           |                                        | mixed ingredients including sugar,<br>milk and cocoa                                     |               |
| chocolate and sweets                            | 18000          | 0              | 18000          | 0.003                                                                     | 6.68                                   |                                                                                          | 0.018         |
| all other confectionary and<br>snacks           | 2000           | 0              | 2000           | 0.000                                                                     | 4.00                                   |                                                                                          | 0.001         |
|                                                 | 59000          | 1000           | 60000          |                                                                           |                                        |                                                                                          |               |
|                                                 |                |                |                |                                                                           |                                        | assuming mixed ingredients of<br>composite meals                                         |               |
| mixed semi solid food                           | 1000           | 250000         | 251000         | 0.037                                                                     | 107.46                                 |                                                                                          | 4.029         |
| drainings from canned food                      | 20000          | 97000          | 117000         | 0.017                                                                     | 0.00                                   | 0                                                                                        | 0.000         |
|                                                 |                |                |                |                                                                           |                                        | assuming mixed ingredients of<br>composite meals                                         |               |
| remaining other                                 | 21000          | 0              | 21000          | 0.003                                                                     | 107.46                                 |                                                                                          | 0.337         |
|                                                 | 42000          | 347000         | 389000         |                                                                           |                                        |                                                                                          |               |
|                                                 | 590000         | 353000         | 943000         |                                                                           |                                        |                                                                                          |               |
| <b>Total per group</b>                          | <b>4710000</b> | <b>2021000</b> | <b>6731000</b> | <b>1</b>                                                                  | g food waste) by per group calculation |                                                                                          | <b>19.308</b> |
| <b>Total per item</b>                           | <b>4706000</b> | <b>2009000</b> | <b>6694000</b> | <b>1</b>                                                                  | kg food waste) by per item calculation |                                                                                          | <b>19.308</b> |
|                                                 |                |                |                | contribution<br>from total of<br>excluded<br>items with<br>unknown<br>COC |                                        |                                                                                          | 0.027         |

Table S5b. from waste weight to production

| Item                                     | Conversion | Source                                                                                                                                                                                                                                                                                |
|------------------------------------------|------------|---------------------------------------------------------------------------------------------------------------------------------------------------------------------------------------------------------------------------------------------------------------------------------------|
| bread to wheat                           | 0.60       | A. Korsaeath et al. (2012) Environmental life cycle assessment of cereal and bread production in Norway, Acta Agriculturae Scandinavica, Section A – Anima                                                                                                                            |
| pasta to grains                          | 0.90       | <a href="https://bakerpedia.com/processes/moisture/">https://bakerpedia.com/processes/moisture/</a>                                                                                                                                                                                   |
| rice to dried rice                       | 0.40       | <a href="https://www.sciencedirect.com/science/article/pii/S0271531705804725">https://www.sciencedirect.com/science/article/pii/S0271531705804725</a>                                                                                                                                 |
| legumes ready-to-eat to dried<br>legumes | 0.35       | <a href="https://link.springer.com/article/10.1007/BF01092032">https://link.springer.com/article/10.1007/BF01092032</a>                                                                                                                                                               |
| fruit juice average pressing<br>yield    | 2.77       | <a href="http://randd.defra.gov.uk/Document.aspx?Document=11123_20130430Annexes1,2,5_6FINALMarch2013.pdf">http://randd.defra.gov.uk/Document.aspx?Document=11123_20130430Annexes1,2,5_6FINALMarch2013.pdf</a>                                                                         |
| wine to grapes                           | 1.58       | <a href="https://grapesandwine.cals.cornell.edu/newsletters/appellation-cornell/2011-newsletters/issue-8/conversion-factors-vineyard-bottle/">https://grapesandwine.cals.cornell.edu/newsletters/appellation-cornell/2011-newsletters/issue-8/conversion-factors-vineyard-bottle/</a> |
| beef                                     | 2.40       | <a href="https://extension.tennessee.edu/publications/Documents/PB1822.pdf">https://extension.tennessee.edu/publications/Documents/PB1822.pdf</a>                                                                                                                                     |
| pork                                     | 1.74       | <a href="https://www.oda.state.ok.us/food/fs-hogweight.pdf">https://www.oda.state.ok.us/food/fs-hogweight.pdf</a>                                                                                                                                                                     |
| poultry                                  | 1.77       | <a href="https://pdfs.semanticscholar.org/63e8/c0a185ddbde1ed626e8f73c54128730df43f.pdf">https://pdfs.semanticscholar.org/63e8/c0a185ddbde1ed626e8f73c54128730df43f.pdf</a>                                                                                                           |
| goat                                     | 3.33       | <a href="http://agriculture.vic.gov.au/agriculture/livestock/goats/production/meat-and-offal-yields-of-goats">http://agriculture.vic.gov.au/agriculture/livestock/goats/production/meat-and-offal-yields-of-goats</a>                                                                 |
| conversion from beer to<br>wheat         | 0.07       | <a href="https://link.springer.com/article/10.1007/s11367-016-1028-6">https://link.springer.com/article/10.1007/s11367-016-1028-6</a>                                                                                                                                                 |

**Table S6. Food category definitions and weights based on empirical samples**

| Category                 | Description                                                                                                                                                                                                               | [1] Weight by group (g) based on data samples      |                                                  |
|--------------------------|---------------------------------------------------------------------------------------------------------------------------------------------------------------------------------------------------------------------------|----------------------------------------------------|--------------------------------------------------|
|                          |                                                                                                                                                                                                                           | Regular users                                      | Food waste heroes                                |
| Baby food                | Liquid baby formula, baby formula powder                                                                                                                                                                                  | N=16<br>ln(w) ~N (6.1, 0.7)                        | [2] NA                                           |
| Baked Goods              | Breads, pastries, cakes, cookies, flatbreads, etc. from bakeries and markets. Includes both savory and sweet baked goods. Can include mixed postings if all (or a vast majority of) items also fall within this category. | N=301<br>Mean = 972<br>Median =400<br>SD = 3838    | N= 399<br>Mean = 572<br>Median =400<br>SD = 763  |
| Beverages                | Liquid beverages, Milk and non-dairy variants thereof (e.g. soy milk).                                                                                                                                                    | N= 160<br>Mean = 2357<br>Median =1000<br>SD = 4544 | N=61<br>Mean = 1572<br>Median =1000<br>SD = 2791 |
| Dairy                    | Butter, yogurt, ice cream, cheese, and other dairy products                                                                                                                                                               | N=58<br>Mean = 7.3<br>Median =500<br>SD = 857      | N= 34<br>ln(w) ~ N (6.3, 0.9)                    |
| <u>Frozen Food</u>       | Mainly frozen meals and other ready-to-cook items. Also includes other food items that must be kept frozen but that do not fall into any other category.                                                                  | N= 42<br>ln(w) ~N (6.2, 1.0)                       | N=19<br>ln(w) ~N (6.9, 0.9)                      |
| Snacks & packaged        | Crackers, chips (crisps), popcorn, and other snack foods.                                                                                                                                                                 | N= 124<br>Mean = 282<br>Median =200<br>SD = 302    | N= 63<br>Mean = 761<br>Median =250<br>SD = 3008  |
| Kitchen & pantry staples | All pantry items, incl. baking ingredients, canned foods, bottles, oils, condiments, spices, grains, and open (i.e. perishable) examples thereof.                                                                         | N=683<br>Mean = 722<br>Median =335<br>SD = 1856    | N=181<br>Mean = 478<br>Median =350<br>SD = 570   |
| Mixed                    | Posts that include substantial amounts from more than one of the food categories listed above                                                                                                                             | N=30<br>ln(w) ~N (7.6, 1.4)                        | N=33<br>ln(w) ~N (7.5, 1.5)                      |
| Prepared Food            | Perishable food that has been prepared for consumption. Includes cooked grains, meals, and chopped vegetables. Excludes sandwiches and baked goods.                                                                       | N= 113<br>Mean = 587<br>Median =320<br>SD = 906    | N=204<br>Mean = 693<br>Median =400<br>SD = 1411  |
| <u>Produce</u>           | Fresh fruits, vegetables, and herbs.                                                                                                                                                                                      | N= 332<br>Mean = 844<br>Median =450<br>SD = 1782   | N=141<br>Mean = 1661<br>Median =500<br>SD = 3084 |
| Protein                  | Meat, eggs, and meat substitutes (e.g. tofu)                                                                                                                                                                              | N= 75<br>Mean = 795<br>Median =440<br>SD = 1110    | N=41<br>ln(w) ~N (6.3, 1.1)                      |
| Sandwiches               | Sandwiches, wraps, ciabatta, and other like items.                                                                                                                                                                        | N=64<br>Mean = 643<br>Median =395<br>SD = 639      | N=142<br>Mean = 608<br>Median =350<br>SD = 980   |
| Tea & Coffee             | Dry tea & coffee, coffee pods                                                                                                                                                                                             | N=103<br>Mean = 243<br>Median =120<br>SD = 434     | NA                                               |

[1] In groups where the empirical samples are N<50 we report statistics of the fitted lognormal distributions from which weights were drawn. For groups where the empirical samples are N>50 we report mean, mode, and SD of empirical distribution from which weights were drawn (in grams).

[2] This group of samples by food waste heroes had only a few items. Therefore, we assumed its distribution is identical to that of regular users.

Table 57a. Monte Carlo results by user type and food category, weights and GHG emissions

|                          |                               | Baby food | Baked goods | Beverages | Dairy | Frozen food | Snack & packaged food | Kitchen & pantry staples | Mixed | Prepared food | Produce | Sandwiches | Tea & coffee | Protein |  |
|--------------------------|-------------------------------|-----------|-------------|-----------|-------|-------------|-----------------------|--------------------------|-------|---------------|---------|------------|--------------|---------|--|
| <b>Food waste heroes</b> | available observations (N)    | 0         | 339         | 61        | 34    | 19          | 63                    | 181                      | 33    | 204           | 141     | 142        | 0            | 41      |  |
|                          | Mean                          | 0         | 579         | 1631      | 900   | 1504        | 729                   | 480                      | 5592  | 657           | 1591    | 604        | 0            | 1021    |  |
|                          | Median                        | 0         | 400         | 1000      | 571   | 977         | 250                   | 350                      | 1843  | 390           | 500     | 350        | 0            | 535     |  |
|                          | 5th percentile                | 0         | 100         | 100       | 124   | 211         | 90                    | 80                       | 144   | 110           | 100     | 195        | 0            | 81      |  |
|                          | 95th percentile               | 0         | 2000        | 5000      | 2735  | 4486        | 1320                  | 2000                     | 21668 | 1800          | 6900    | 1500       | 0            | 3379    |  |
|                          | Mean                          | 0.00      | 14.55       | 1.79      | 0.90  | 0.18        | 1.71                  | 3.72                     | 9.54  | 8.52          | 22.32   | 6.67       | 0.00         | 1.06    |  |
|                          | Median                        | 0.00      | 14.55       | 1.78      | 0.90  | 0.18        | 1.70                  | 3.72                     | 9.51  | 8.52          | 22.31   | 6.67       | 0.00         | 1.06    |  |
|                          | <b>Mass (tons)</b>            |           |             |           |       |             |                       |                          |       |               |         |            |              |         |  |
|                          | 5th percentile                | 0.00      | 14.35       | 1.63      | 0.85  | 0.15        | 1.49                  | 3.64                     | 8.63  | 8.29          | 21.76   | 6.50       | 0.00         | 0.98    |  |
|                          | 95th percentile               | 0.00      | 14.76       | 1.95      | 0.96  | 0.22        | 1.94                  | 3.81                     | 10.50 | 8.76          | 22.89   | 6.85       | 0.00         | 1.15    |  |
|                          | Mean                          | 0.00      | 62.58       | 7.69      | 3.89  | 0.79        | 7.35                  | 16.01                    | 41.01 | 36.65         | 95.97   | 28.70      | 0.00         | 4.56    |  |
|                          | Median                        | 0.00      | 62.57       | 7.67      | 3.89  | 0.78        | 7.32                  | 16.00                    | 40.91 | 36.64         | 95.96   | 28.69      | 0.00         | 4.55    |  |
|                          | 5th percentile                | 0.00      | 61.72       | 7.01      | 3.65  | 0.66        | 6.40                  | 15.65                    | 37.08 | 35.67         | 93.53   | 27.96      | 0.00         | 4.19    |  |
| 95th percentile          | 0.00                          | 63.45     | 8.40        | 4.14      | 0.94  | 8.35        | 16.37                 | 45.19                    | 37.67 | 98.41         | 29.46   | 0.00       | 4.94         |         |  |
| <b>Regular users</b>     | available observations (N)    | 16        | 301         | 160       | 58    | 42          | 124                   | 683                      | 30    | 113           | 332     | 64         | 103          | 75      |  |
|                          | Mean                          | 566       | 966         | 2311      | 699   | 751         | 283                   | 746                      | 4992  | 581           | 839     | 642        | 241          | 799     |  |
|                          | <b>Weight per listing (g)</b> |           |             |           |       |             |                       |                          |       |               |         |            |              |         |  |
|                          | Median                        | 455       | 400         | 1000      | 500   | 481         | 200                   | 330                      | 1953  | 320           | 450     | 400        | 120          | 440     |  |
|                          | 5th percentile                | 151       | 125         | 170       | 125   | 98          | 50                    | 30                       | 201   | 99            | 50      | 195        | 16           | 100     |  |
|                          | 95th percentile               | 1346      | 2400        | 9000      | 2100  | 2256        | 800                   | 2157                     | 18473 | 1830          | 2500    | 1902       | 720          | 4032    |  |
|                          | Mean                          | 0.10      | 3.10        | 3.33      | 0.35  | 0.19        | 0.46                  | 5.58                     | 1.61  | 1.03          | 2.81    | 0.56       | 0.46         | 0.43    |  |
|                          | Median                        | 0.10      | 3.09        | 3.32      | 0.35  | 0.19        | 0.46                  | 5.58                     | 1.59  | 1.03          | 2.81    | 0.56       | 0.46         | 0.43    |  |
|                          | 5th percentile                | 0.10      | 2.77        | 3.05      | 0.32  | 0.17        | 0.44                  | 5.31                     | 1.30  | 0.97          | 2.64    | 0.53       | 0.43         | 0.39    |  |
|                          | 95th percentile               | 0.11      | 3.47        | 3.61      | 0.38  | 0.21        | 0.48                  | 5.86                     | 2.01  | 1.09          | 2.99    | 0.59       | 0.49         | 0.48    |  |
|                          | Mean                          | 0.45      | 13.34       | 14.30     | 1.49  | 0.80        | 1.99                  | 24.00                    | 6.93  | 4.42          | 12.09   | 2.41       | 1.99         | 1.87    |  |
|                          | Median                        | 0.45      | 13.29       | 14.30     | 1.48  | 0.80        | 1.99                  | 23.99                    | 6.82  | 4.41          | 12.07   | 2.41       | 1.99         | 1.86    |  |
|                          | 5th percentile                | 0.41      | 11.88       | 13.13     | 1.36  | 0.71        | 1.91                  | 22.82                    | 5.61  | 4.16          | 11.36   | 2.28       | 1.86         | 1.68    |  |
| 95th percentile          | 0.49                          | 14.93     | 15.53       | 1.63      | 0.91  | 2.08        | 25.19                 | 8.67                     | 4.67  | 12.86         | 2.55    | 2.12       | 2.05         |         |  |

Table 57b. Monte Carlo results by user type and food category, economic value

|                                      |                            | Baby food                  | Baked goods | Beverages | Dairy | Frozen food | Snack & packaged food | Kitchen & pantry staples | Mixed  | Prepared food | Produce | Sandwiches | Tea & coffee | Protein |      |
|--------------------------------------|----------------------------|----------------------------|-------------|-----------|-------|-------------|-----------------------|--------------------------|--------|---------------|---------|------------|--------------|---------|------|
| <b>Food waste heroes</b>             | available observations (N) | 0                          | 339         | 61        | 34    | 19          | 63                    | 181                      | 33     | 204           | 141     | 142        | 0            | 41      |      |
|                                      | Mean                       | 0.00                       | 6.41        | 6.75      | 9.70  | 7.45        | 5.10                  | 5.98                     | 66.95  | 7.41          | 5.54    | 8.05       | 0.00         | 7.70    |      |
|                                      | Median                     | 0.00                       | 3.00        | 2.00      | 5.26  | 5.19        | 2.00                  | 3.00                     | 22.59  | 5.00          | 2.20    | 6.00       | 0.00         | 4.35    |      |
|                                      | 5th percentile             | 0.00                       | 0.80        | 0.55      | 0.83  | 1.29        | 0.70                  | 0.60                     | 1.94   | 1.10          | 0.81    | 2.10       | 0.00         | 0.71    |      |
|                                      | 95th percentile            | 0.00                       | 18.00       | 20.00     | 32.91 | 20.91       | 18.00                 | 15.00                    | 262.66 | 24.00         | 26.00   | 20.00      | 0.00         | 25.66   |      |
|                                      | Mean                       | 0.000                      | 0.161       | 0.007     | 0.010 | 0.001       | 0.012                 | 0.046                    | 0.114  | 0.096         | 0.078   | 0.089      | 0.000        | 0.008   |      |
|                                      | Median                     | 0.000                      | 0.161       | 0.007     | 0.010 | 0.001       | 0.012                 | 0.046                    | 0.114  | 0.096         | 0.078   | 0.089      | 0.000        | 0.008   |      |
|                                      | 5th percentile             | 0.000                      | 0.157       | 0.006     | 0.009 | 0.001       | 0.011                 | 0.043                    | 0.104  | 0.095         | 0.076   | 0.088      | 0.000        | 0.007   |      |
|                                      | 95th percentile            | 0.000                      | 0.166       | 0.008     | 0.011 | 0.001       | 0.013                 | 0.050                    | 0.125  | 0.097         | 0.079   | 0.090      | 0.000        | 0.009   |      |
|                                      | <b>Regular users</b>       | available observations (N) | 16          | 301       | 160   | 58          | 42                    | 124                      | 683    | 30            | 113     | 332        | 64           | 112     | 75   |
|                                      |                            | Mean                       | 5.02        | 5.21      | 6.17  | 4.26        | 5.41                  | 3.06                     | 3.88   | 24.15         | 4.89    | 2.02       | 9.26         | 6.73    | 5.15 |
|                                      |                            | Median                     | 4.11        | 2.00      | 3.00  | 2.00        | 3.47                  | 2.00                     | 2.00   | 13.07         | 2.80    | 1.47       | 5.00         | 3.98    | 3.40 |
|                                      |                            | 5th percentile             | 1.40        | 0.70      | 0.60  | 1.00        | 0.71                  | 0.65                     | 0.40   | 2.08          | 0.80    | 0.34       | 2.35         | 0.84    | 0.85 |
| 95th percentile                      |                            | 11.80                      | 20.00       | 25.00     | 9.50  | 16.89       | 10.00                 | 12.00                    | 79.99  | 20.00         | 6.00    | 27.00      | 14.00        | 15.60   |      |
| Mean                                 |                            | 0.001                      | 0.017       | 0.009     | 0.002 | 0.001       | 0.005                 | 0.029                    | 0.008  | 0.009         | 0.007   | 0.008      | 0.013        | 0.003   |      |
| Median                               |                            | 0.001                      | 0.017       | 0.009     | 0.002 | 0.001       | 0.005                 | 0.029                    | 0.008  | 0.009         | 0.007   | 0.008      | 0.013        | 0.003   |      |
| 5th percentile                       |                            | 0.001                      | 0.016       | 0.008     | 0.002 | 0.001       | 0.005                 | 0.028                    | 0.007  | 0.008         | 0.007   | 0.008      | 0.012        | 0.003   |      |
| 95th percentile                      |                            | 0.001                      | 0.018       | 0.010     | 0.002 | 0.002       | 0.005                 | 0.031                    | 0.009  | 0.009         | 0.007   | 0.009      | 0.014        | 0.003   |      |
| <b>Value per listing (pounds UK)</b> |                            |                            |             |           |       |             |                       |                          |        |               |         |            |              |         |      |
| Mean                                 |                            | 0.001                      | 0.017       | 0.009     | 0.002 | 0.001       | 0.005                 | 0.029                    | 0.008  | 0.009         | 0.007   | 0.008      | 0.013        | 0.003   |      |
| Median                               |                            | 0.001                      | 0.017       | 0.009     | 0.002 | 0.001       | 0.005                 | 0.029                    | 0.008  | 0.009         | 0.007   | 0.008      | 0.013        | 0.003   |      |
| 5th percentile                       |                            | 0.001                      | 0.016       | 0.008     | 0.002 | 0.001       | 0.005                 | 0.028                    | 0.007  | 0.008         | 0.007   | 0.008      | 0.012        | 0.003   |      |
| 95th percentile                      | 0.001                      | 0.018                      | 0.010       | 0.002     | 0.002 | 0.005       | 0.031                 | 0.009                    | 0.009  | 0.007         | 0.009   | 0.014      | 0.003        |         |      |

**Table S8a. UK exchanges by Income Decile (where 1 is most deprived 10% of LSOAs)**

|           |        | collectors |        |        |        |       |       |       |       |       |        |        |
|-----------|--------|------------|--------|--------|--------|-------|-------|-------|-------|-------|--------|--------|
|           |        | 1          | 2      | 3      | 4      | 5     | 6     | 7     | 8     | 9     | 10     | Total  |
| suppliers | 1      | 2,178      | 2,506  | 1,542  | 1,146  | 517   | 543   | 340   | 386   | 219   | 488    | 9,865  |
|           | 2      | 3,047      | 4,858  | 3,580  | 1,954  | 2,001 | 1,223 | 941   | 878   | 348   | 801    | 19,631 |
|           | 3      | 1,286      | 2,515  | 3,540  | 1,716  | 1,774 | 1,003 | 620   | 714   | 388   | 631    | 14,187 |
|           | 4      | 1,516      | 2,424  | 1,923  | 2,852  | 1,128 | 898   | 812   | 577   | 452   | 785    | 13,367 |
|           | 5      | 581        | 878    | 951    | 594    | 1,303 | 645   | 547   | 575   | 254   | 697    | 7,025  |
|           | 6      | 548        | 991    | 941    | 802    | 751   | 954   | 483   | 388   | 320   | 400    | 6,578  |
|           | 7      | 462        | 764    | 1,202  | 773    | 836   | 1,009 | 1,259 | 765   | 490   | 837    | 8,397  |
|           | 8      | 271        | 396    | 657    | 389    | 609   | 435   | 366   | 493   | 215   | 318    | 4,149  |
|           | 9      | 207        | 306    | 468    | 263    | 659   | 507   | 385   | 335   | 592   | 556    | 4,278  |
|           | 10     | 348        | 537    | 1,041  | 650    | 672   | 640   | 814   | 496   | 393   | 2,255  | 7,846  |
| Total     | 10,444 | 16,175     | 15,845 | 11,139 | 10,250 | 7,857 | 6,567 | 5,607 | 3,671 | 7,768 | 95,323 |        |

**Table S8b. UK exchanges by Education Decile (where 1 is most deprived 10% of LSOAs)**

|           |       | collectors |       |       |        |        |        |        |       |        |        |        |
|-----------|-------|------------|-------|-------|--------|--------|--------|--------|-------|--------|--------|--------|
|           |       | 1          | 2     | 3     | 4      | 5      | 6      | 7      | 8     | 9      | 10     | Total  |
| suppliers | 1     | 922        | 452   | 385   | 416    | 154    | 137    | 137    | 329   | 120    | 151    | 3,203  |
|           | 2     | 472        | 987   | 370   | 365    | 210    | 401    | 197    | 259   | 145    | 211    | 3,617  |
|           | 3     | 207        | 427   | 1,187 | 873    | 963    | 866    | 828    | 610   | 539    | 641    | 7,141  |
|           | 4     | 165        | 324   | 829   | 1,718  | 1,383  | 1310   | 871    | 885   | 573    | 1078   | 9,136  |
|           | 5     | 180        | 595   | 695   | 880    | 1,917  | 1689   | 1034   | 1000  | 774    | 907    | 9,671  |
|           | 6     | 292        | 764   | 1042  | 1663   | 1851   | 3709   | 1974   | 1856  | 1422   | 1709   | 16,282 |
|           | 7     | 163        | 419   | 841   | 828    | 1315   | 1,377  | 1,412  | 1226  | 827    | 1234   | 9,642  |
|           | 8     | 120        | 424   | 818   | 978    | 1652   | 1681   | 1712   | 2049  | 1752   | 2611   | 13,797 |
|           | 9     | 151        | 318   | 612   | 709    | 1118   | 1215   | 920    | 1387  | 1374   | 1837   | 9,641  |
|           | 10    | 154        | 366   | 455   | 777    | 1081   | 1683   | 1120   | 1438  | 1807   | 4,312  | 13,193 |
| Total     | 2,826 | 5,076      | 7,234 | 9,207 | 11,644 | 14,068 | 10,205 | 11,039 | 9,333 | 14,691 | 95,323 |        |

## Supplementary notes

### Supplementary Note 1. Introduction

OLIO is a UK based food sharing startup founded in 2015 by Tessa Clarke and Sasha Celestial One. The platform can be accessed via Web browsers (<https://olioex.com/>) or dedicated smartphone apps and is freely available through the Apple and Samsung application stores. At the time of writing the platform had over 700,000 registered users worldwide. While the main focus is on food, the platform also has sections for sharing furniture, clothes etc. In addition to regular users, offering whatever food waste they have in their houses, OLIO also operates a network of individual volunteers, called 'food waste heroes', who collect food surplus from local businesses such as delis and bakeries, and offers them for collection via the network. OLIO's business model is to charge local businesses for certifying that they are 'zero-food waste' operators. Critically, while the startup is a for-profit enterprise, users are free to post or collect as many items as they wish, and all exchanges facilitated via the platform are currently free of charge.

### Supplementary Note 2. Classification into food categories

We developed the classification scheme using an iterative and inductive process. Each of the 53,463 OLIO postings that comprised the training set was first manually categorized by one of four researchers. These categories were not predetermined; the researchers were free to create categories as needed. Efforts were made to select food categories that appeared to be mutually exclusive and sufficiently encompassing, which required a degree of iteration even within the first pass. The nature of the data posed some challenges for effective categorization. For one, information about each posting was exclusively in open text fields, which means there was no standard format in terms of text structure or content. Furthermore, the international scope of OLIO's user base means that there were many food products and slang terms used that were unfamiliar to the researchers.

Nevertheless, this initial pass through the data set resulted in 448 unique tags, which were then harmonized and condensed to 19 categories by a single researcher. After identifying systemic errors and inconsistencies, some of which stemmed from the open field format of the listings and others which stemmed from differences of the three initial coders, a second pass by a single researcher adjusted and reduced the categories down to 15. This scheme was used to train the classifier and test accuracy of the algorithm. Based on results from this test, a final scheme of 13 food categories (see Supplementary Table 6 in the SI excel) and 3 non-food categories (supplements, pet foods and NA) was imposed on the training set. This is the classification used in this paper

### Supplementary Note 3. Sensitivity analysis- Environmental cost benefit

The sensitivity analysis followed the same steps as the main analysis differing only in the GHG emissions coefficients used for calculations. For environmental benefits resulting from avoided food waste, we chose a lower value for GHG reductions,  $e_{\text{waste}} = 2.1\text{tCO}_2\text{eq/ton}$  for food waste, as reported by the European Commission (2011) for the whole EU. For environmental costs associated with added road travel, we chose higher emissions factors -  $e_{\text{car}} = 240$

gCO<sub>2</sub>eq/passenger-km, as reported by European Environment Agency (2018) for the average passenger vehicle in the EU, and  $e_{\text{bus}}=120$  gCO<sub>2</sub>eq/passenger-km, as reported for a regular bus outside of London by Hill et al. (2018). Since no uncertainty was reported for these coefficients, we used Monte Carlo analysis ( $10^4$ ) to estimate them (assuming a normal distribution with a coefficient of variation of 10%). Result for sensitivity analysis are presented in the supplementary information (see Supplementary Tables 4a-c in the SI excel).
